# Supplementary material for: One-step photo-induced modification of carbon nanotubesviapolymeric diazonium chemistry
Source: Royal Society of Chemistry journal article supplement (doi:10.1039/d3py01364b), 2024-01-01
Supplement: d3py01364b1.pdf [file d3py01364b1.pdf]

## Supplementary Material

### **One-step Photo-induced Modification of Carbon Nanotubes via Polymeric Diazonium Chemistry**

**Zixuan Zhu, Xinyi Pan and Yaning He \***

Department of Chemical Engineering, Key Laboratory for Advanced Materials (MOE),  
Tsinghua University, Beijing, 100084, China.

\* Corresponding author.

E-mail address: [heyanning@mail.tsinghua.edu.cn](mailto:heyanning@mail.tsinghua.edu.cn) (Y. He).

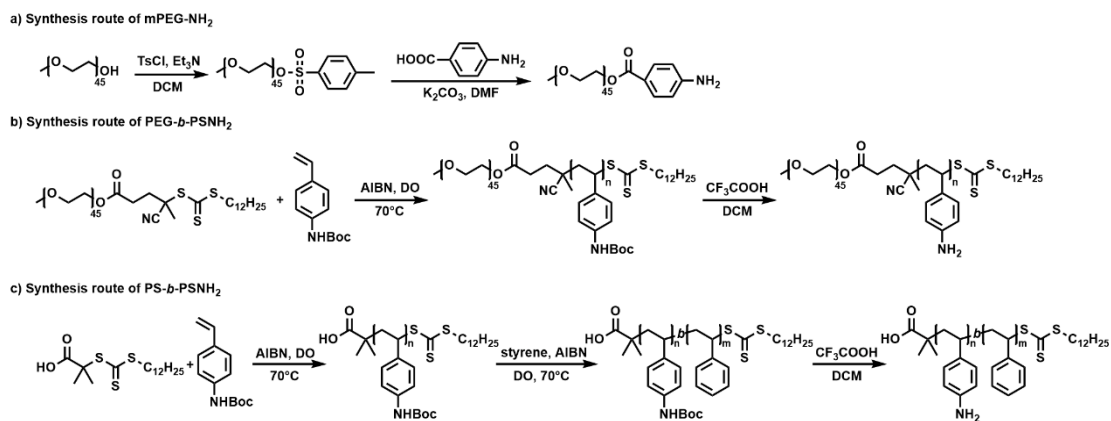

**Scheme S1** Synthesis routes of (a) mPEG-NH<sub>2</sub>, (b) PEG-*b*-PSNH<sub>2</sub> and (c) PS-*b*-PSNH<sub>2</sub>.

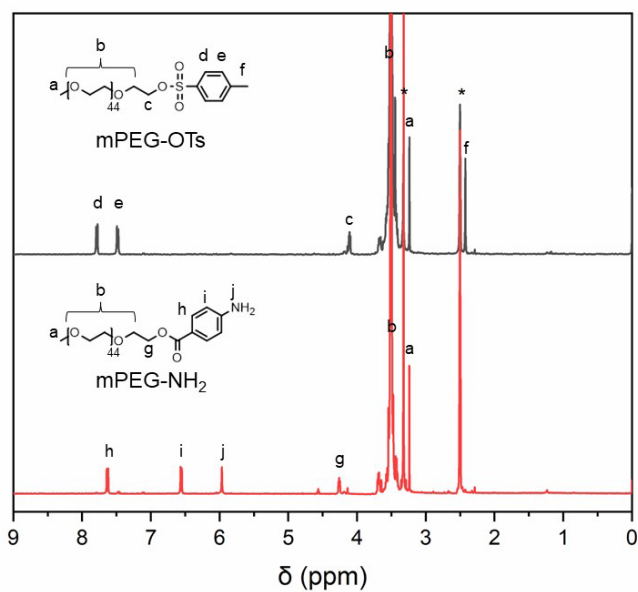

**Fig. S1** <sup>1</sup>H NMR spectra of mPEG-OTs and mPEG-NH<sub>2</sub> in DMSO-d<sub>6</sub>. Black asterisks (\*) indicate the solvent and water peaks.

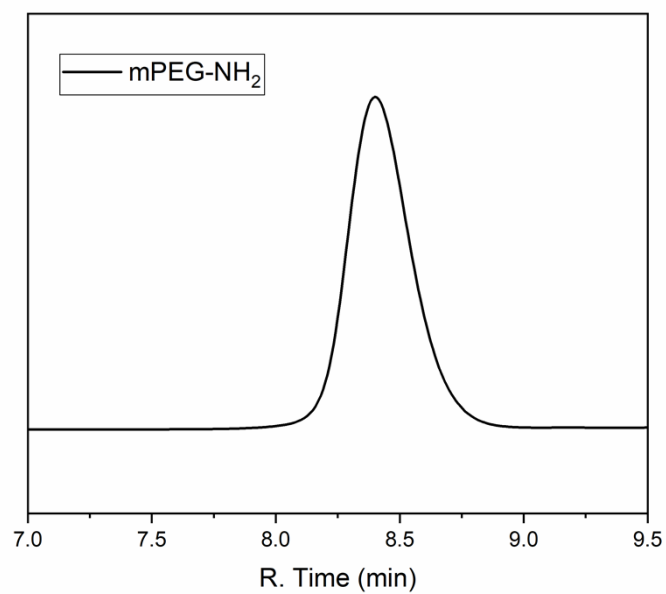

**Fig. S2** GPC trace of aniline-terminated poly(ethylene glycol) (mPEG-NH<sub>2</sub>).  $M_n = 2700$ , PDI = 1.04.

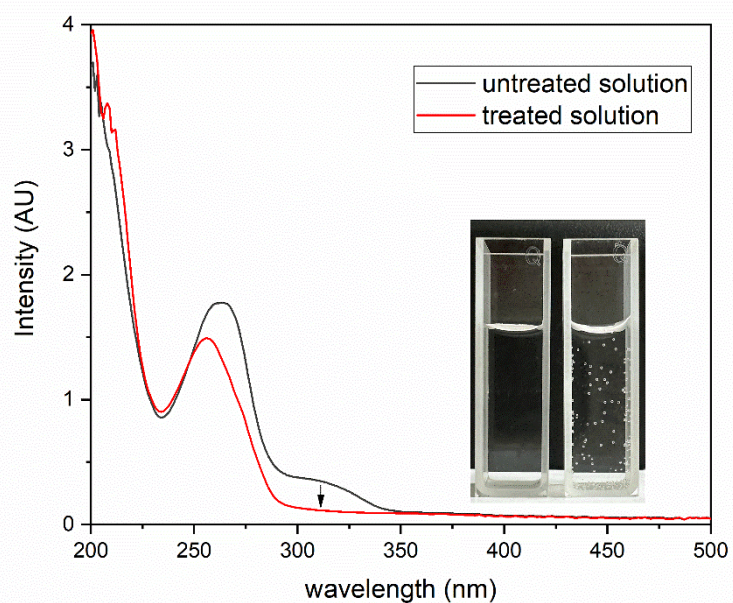

**Fig. S3** UV-vis absorption spectra of mPEG-N<sub>2</sub><sup>+</sup> before and after UV irradiation (275 nm). The inset optical graph of untreated solution (left) and treated solution (right) showed the formation of tiny bubbles after irradiation.

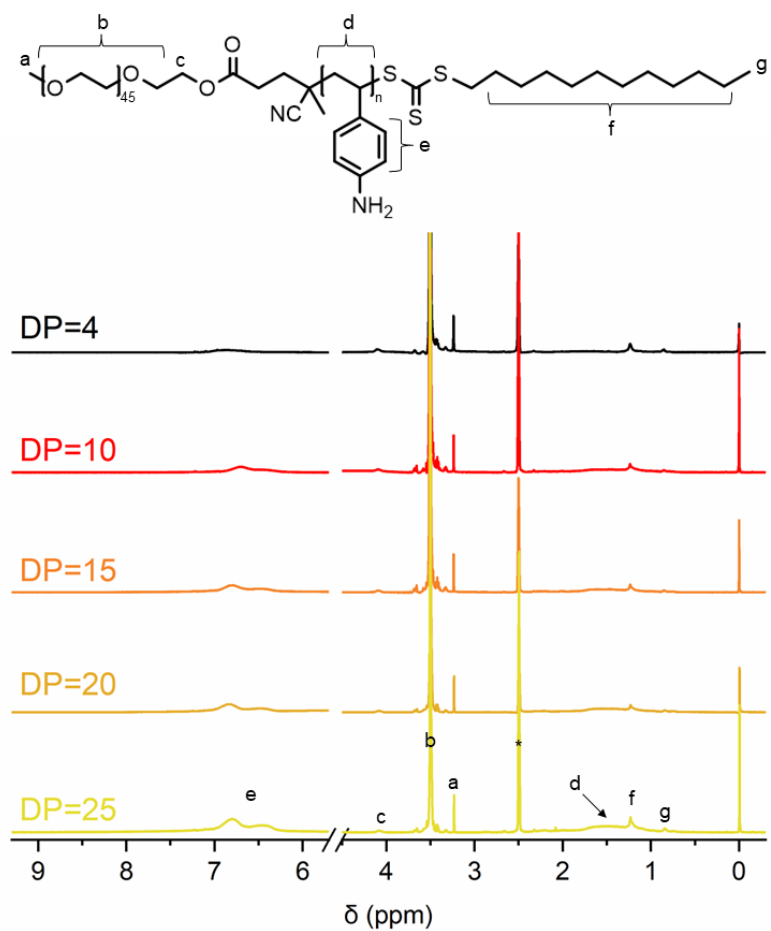

**Fig. S4** <sup>1</sup>H NMR spectra of PEG-*b*-PSNH<sub>2</sub> (DP = 4, 10, 15, 20, 25) in DMSO-*d*<sub>6</sub>. Black asterisk (\*) indicate the solvent peak.

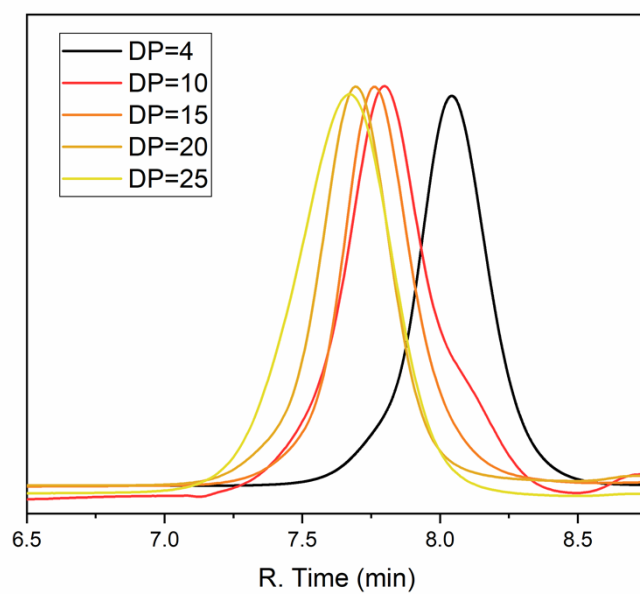

**Fig. S5** GPC traces of block copolymer PEG-*b*-PSNHBoc (DP = 4, 10, 15, 20, 25).

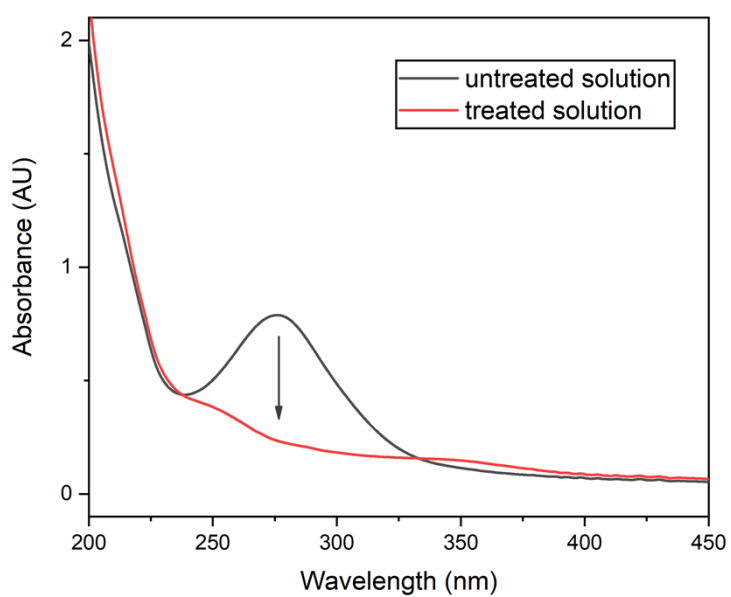

**Fig. S6** UV-vis absorption spectra of PEG-*b*-PSN<sub>2</sub><sup>+</sup> before and after UV irradiation (275 nm).

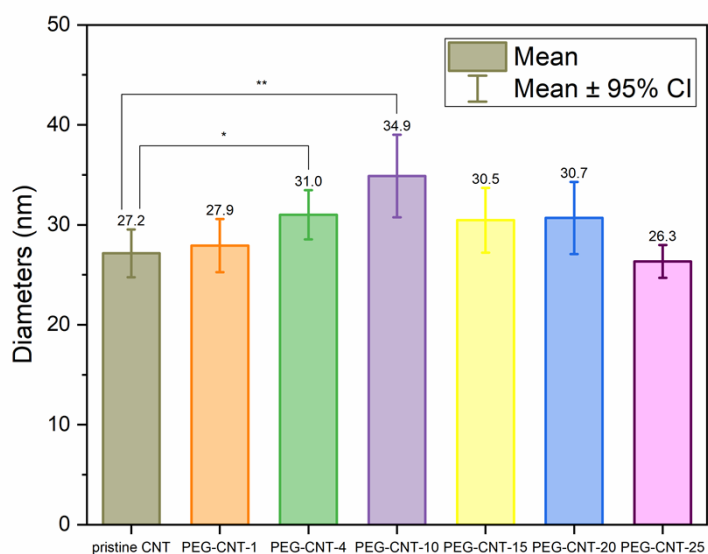

**Fig. S7** Diameter distributions of pristine CNTs and PEG-CNTs after modification, where the statistically significant differences were only observed between pristine CNTs and PEG-CNT-4 ( $p < 0.05$ ) and between pristine CNTs and PEG-CNT-10 ( $p < 0.01$ ).

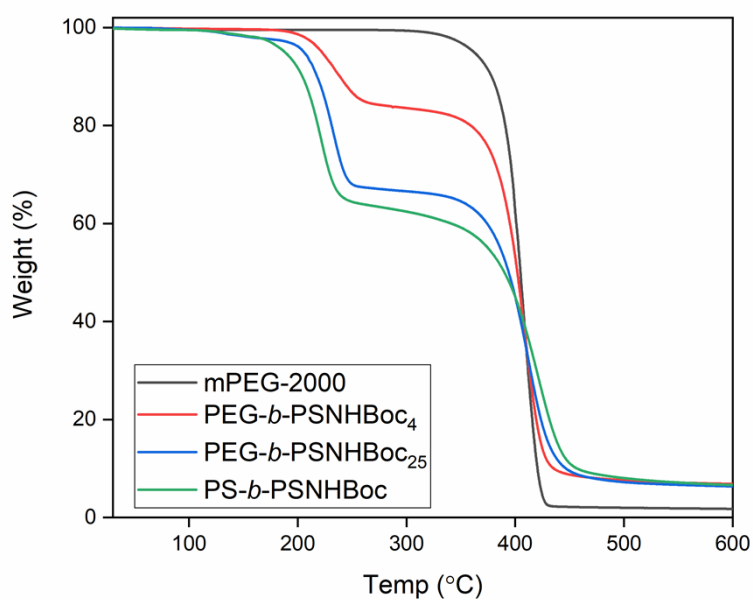

**Fig. S8** TGA curves of mPEG-2000 and precursors of block polymeric diazonium salts.

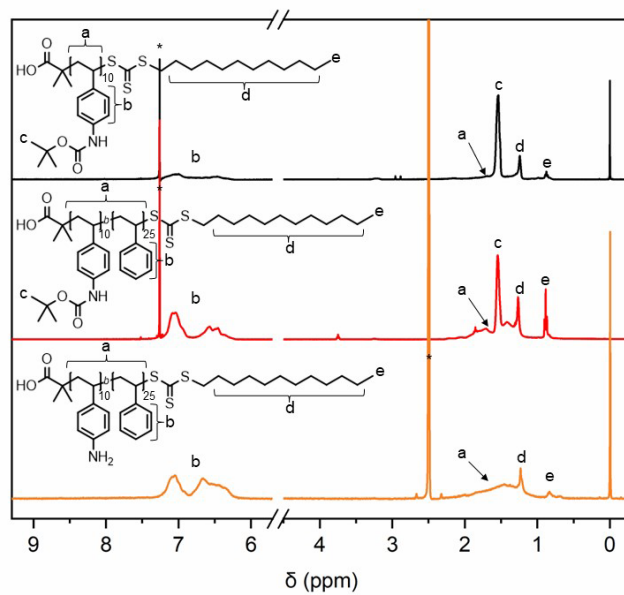

**Fig. S9** <sup>1</sup>H NMR spectra of PSNHBoc-DDMAT (black), PS-*b*-PSNHBoc (red) in CDCl<sub>3</sub> and PS-*b*-PSNH<sub>2</sub> (orange) in DMSO- $\delta_6$ . Black asterisks (\*) indicate the solvent peaks.

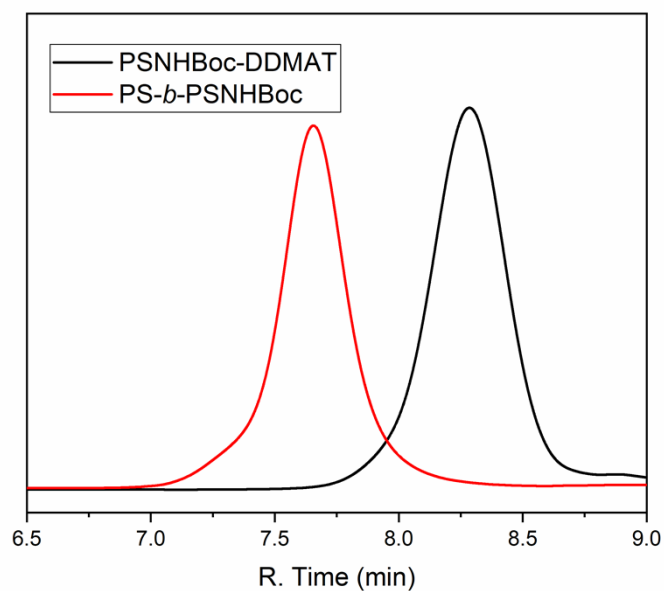

**Fig. S10** GPC traces of PSNHBoc-DDMAT (black) and PS-*b*-PSNHBoc (red).

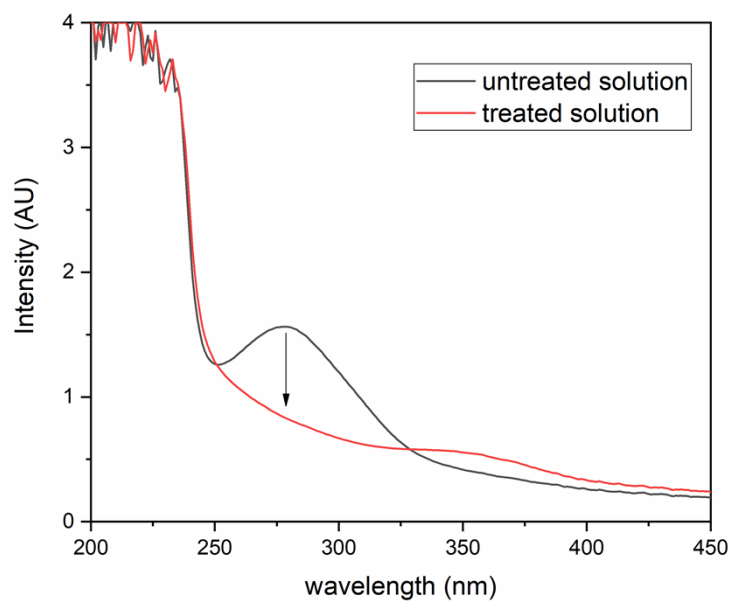

**Fig. S11** UV-vis absorption spectra of PS-*b*-PSN<sub>2</sub><sup>+</sup> before and after UV irradiation (275 nm).

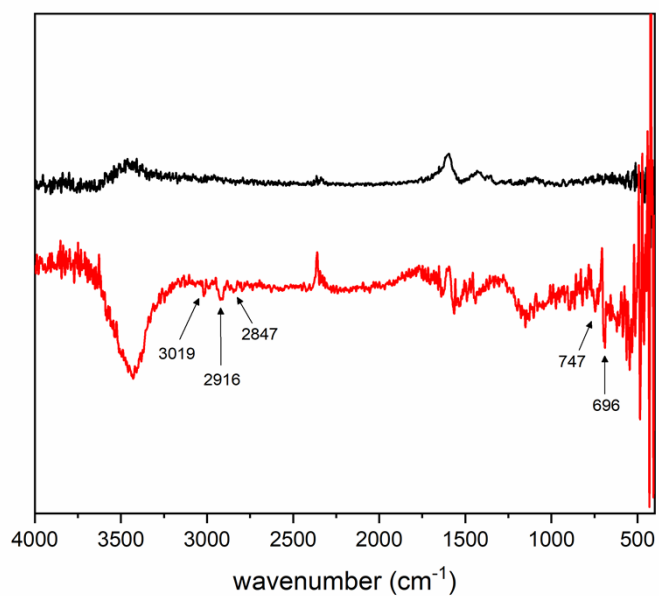

**Fig. S12** FTIR spectra of pristine CNT (black) and PS-CNT (red).



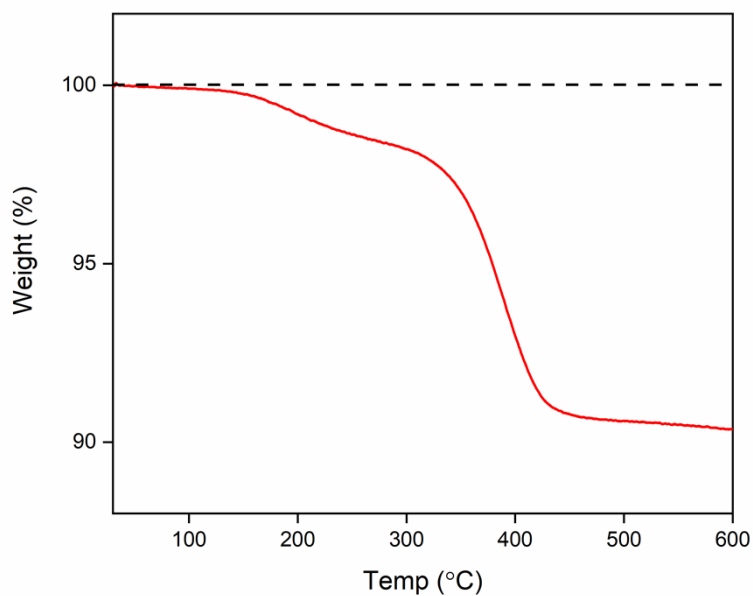

**Fig. S13** TGA curve of PS-CNT (red) with dash line that highlights the original weight.

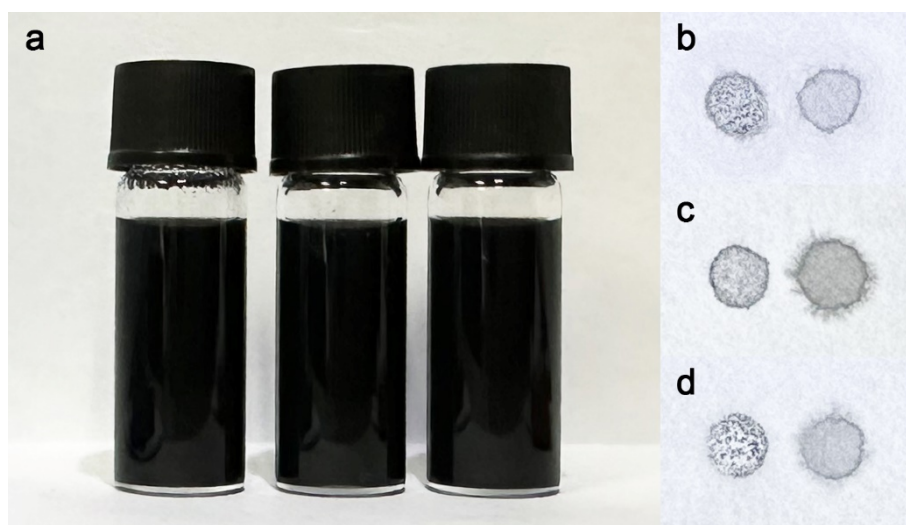

**Fig. S14** (a) Organic suspensions of PS-CNT with the concentration of 1 mg/mL after 48 h. Bottles from left to right are suspensions in DMF, THF and acetone. Sediment on filter paper of 10  $\mu$ L suspension of pristine CNT (left) and PS-CNT (right) in (b) DMF, (c) THF and (d) acetone.

**Table S1** Number Average Molecular Weights ( $M_n$ ) and Corresponding Molecular Weight Distributions ( $M_w/M_n$ ) of Block Copolymer PEG-*b*-PSNHBoc (DP = 4, 10, 15, 20, 25).

| Polymer                              | $M_n$             | $M_w/M_n$ |
|--------------------------------------|-------------------|-----------|
| PEG- <i>b</i> -PSNHBoc <sub>4</sub>  | $5.0 \times 10^3$ | 1.06      |
| PEG- <i>b</i> -PSNHBoc <sub>10</sub> | $7.1 \times 10^3$ | 1.09      |
| PEG- <i>b</i> -PSNHBoc <sub>15</sub> | $7.6 \times 10^3$ | 1.06      |
| PEG- <i>b</i> -PSNHBoc <sub>20</sub> | $9.0 \times 10^3$ | 1.06      |
| PEG- <i>b</i> -PSNHBoc <sub>25</sub> | $9.5 \times 10^3$ | 1.08      |

**Table S2** Number Average Molecular Weights ( $M_n$ ) and Corresponding Molecular Weight Distributions ( $M_w/M_n$ ) of PSNHBoc-DDMAT and PS-*b*-PSNHBoc.

| Polymer               | DP of PSNHBoc | DP of PS | $M_n$             | $M_w/M_n$ |
|-----------------------|---------------|----------|-------------------|-----------|
| PSNHBoc-DDMAT         | 10            | /        | $3.4 \times 10^3$ | 1.06      |
| PS- <i>b</i> -PSNHBoc | 10            | 25       | $9.4 \times 10^3$ | 1.09      |

**Table S3** Feed Amounts of Reagents in Diazotization of mPEG-NH<sub>2</sub> and PEG-*b*-PSNH<sub>2</sub>

| Polymer                                    | V <sub>HCl</sub> (mL) | V <sub>H<sub>2</sub>O</sub> (mL) | V <sub>NaNO<sub>2</sub></sub> (mL) |
|--------------------------------------------|-----------------------|----------------------------------|------------------------------------|
| mPEG-NH <sub>2</sub>                       | 0.15                  | 3.54                             | 0.06                               |
| PEG- <i>b</i> -PSNH <sub>2</sub> (DP = 4)  | 0.15                  | 3.36                             | 0.24                               |
| PEG- <i>b</i> -PSNH <sub>2</sub> (DP = 10) | 0.15                  | 3.00                             | 0.60                               |
| PEG- <i>b</i> -PSNH <sub>2</sub> (DP = 15) | 0.15                  | 2.70                             | 0.90                               |
| PEG- <i>b</i> -PSNH <sub>2</sub> (DP = 20) | 0.15                  | 2.40                             | 1.20                               |
| PEG- <i>b</i> -PSNH <sub>2</sub> (DP = 25) | 0.15                  | 2.10                             | 1.50                               |
